# Supplementary material for: A high performance phenyl-free LED photoinitiator for cationic or hybrid photopolymerization and its application in LED cationic 3D printing
Source: Royal Society of Chemistry journal article supplement (doi:10.1039/d0py00142b), 2020-01-01
Supplement: d0py00142b1.pdf [file d0py00142b1.pdf]

Supporting information

**High performance phenyl-free LED photoinitiator for cationic or hybrid photopolymerization and its application in LED cationic 3D printing**

Liqun Tang, Jun Nie, Xiaoqun Zhu\*

State Key Laboratory of Chemical Resource Engineering, Beijing  
University of Chemical Technology, Beijing 100029, P. R. China.

E-mail: [zhuxq@mail.buct.edu.cn](mailto:zhuxq@mail.buct.edu.cn).

**Synthesis of 1,3-bis(1-methyl-1H-pyrrol-2-yl)prop-2-en-1-one**

2mL N-Methylpyrrole-2-carboxaldehyde, 2mL 2-Acetyl-1-methylpyrrole, 20mL ethanol and 0.1g NaOH, 10g deionized water were added into a 100mL three-necked round bottom flask. The solution was stirred by magnetic stirrer at room temperature for 8 h under the nitrogen protection. The crude product was obtained by filtration under reduced pressure and was purified by recrystallization from Ethanol. The pure product was obtained as a Light yellow crystal. <sup>1</sup>H NMR (400 MHz, CDCl<sub>3</sub>, δ): 7.856-7.837 (t, 1H, NMPy-CH) , 7.818 (s, 1H, NMPy-CH) , 7.665 (d, 1H, C-CH=C) , 7.286 (s, 1H, NMPy-CH) , 7.215-7.178 (m, 1H, C=CH-C=O) 6.878-6.868 (d, 1H, NMPy-CH) , 6.845 (s, 1H, NMPy-CH) , 6.262-6.246 (t, 1H, NMPy-CH) 3.794 (s, 6H, N-CH<sub>3</sub>)

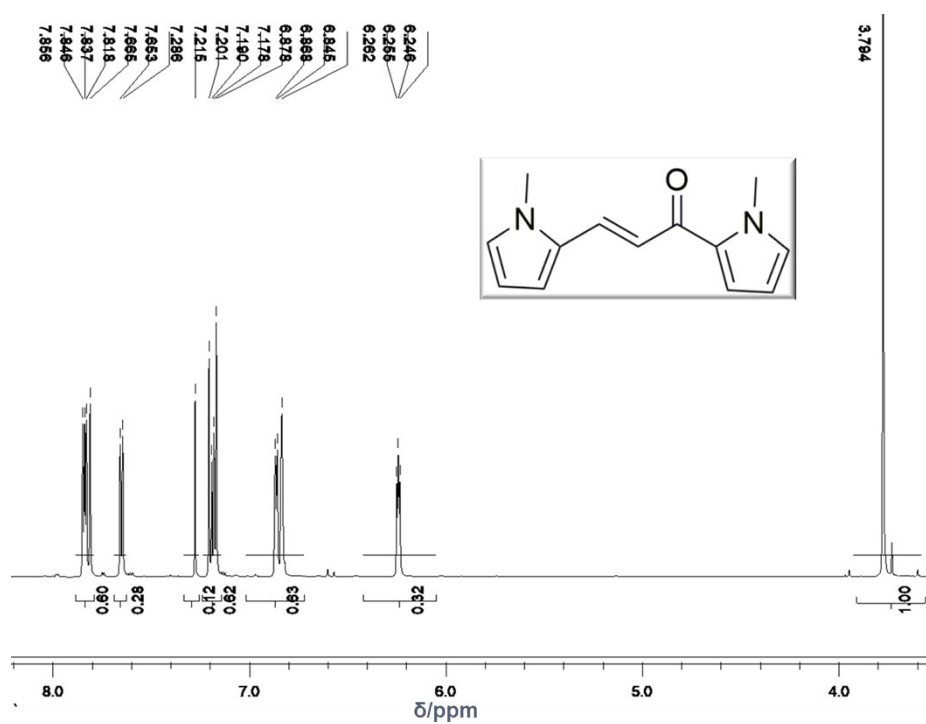

**Figure S1** The  $^1\text{H}$  NMR spectrum of BMO

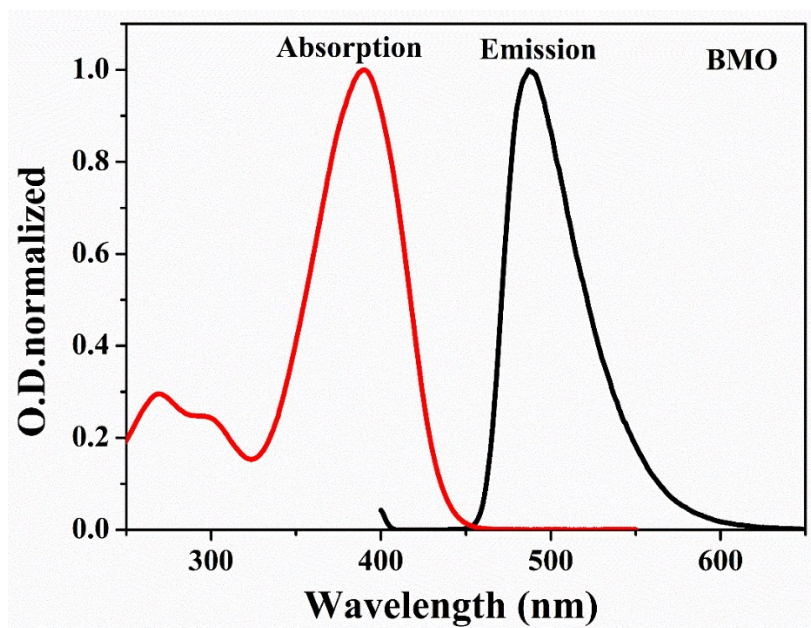

**Figure S2** Normalized absorption and emission spectra of BMO in acetonitrile

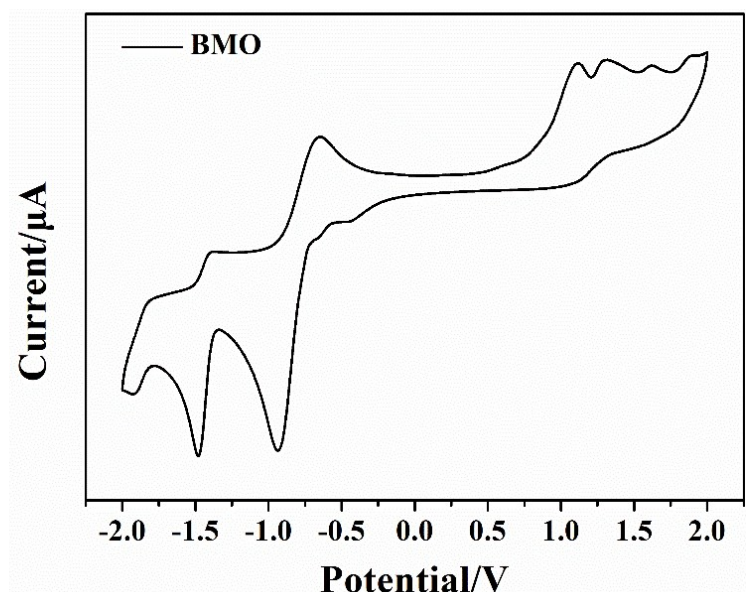

**Figure S3** Cyclic voltammograms of BMO ( $4 \times 10^{-4}$  mol/L) in anhydrous acetonitrile solution purged with  $\text{N}_2$ . A platinum electrode at a scan rate of  $100 \text{ mV s}^{-1}$  with 0.1 M tetrabutylammonium hexafluorophosphate as the supporting electrolyte, and the reference electrode was a saturated calomel electrode (SCE). Ferrocene was used as a standard, and the potentials determined from the half-peak potential were referred to the reversible formal potential of this compound (+0.38 V/SCE).
